# Supplementary material
Source: publisher figshare collection journal article supplement (https://karger.figshare.com/articles/dataset/_/5126185)
Supplement: Supplementary file 5 [file 1]

Archive with 4 entries (4 files):
- 000358487_sm_Figure_S1.pdf
- 000358487_sm_Figure_S2.pdf
- 000358487_sm_Figure_S3.pdf
- 000358487_sm_Legends.PDF
