# Supplementary material
Source: publisher figshare collection journal article supplement (https://karger.figshare.com/articles/dataset/_/5126185)

Donor 1

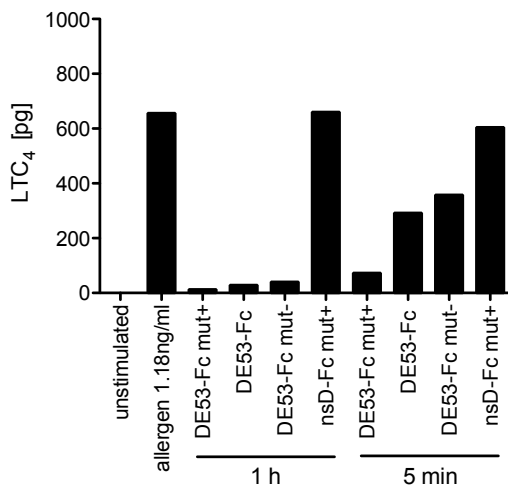

Donor 2

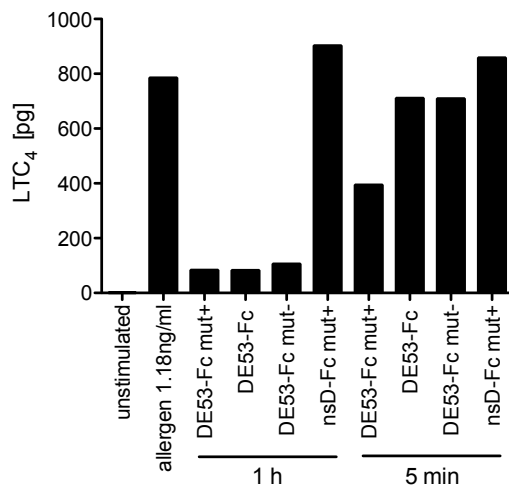

Donor 3

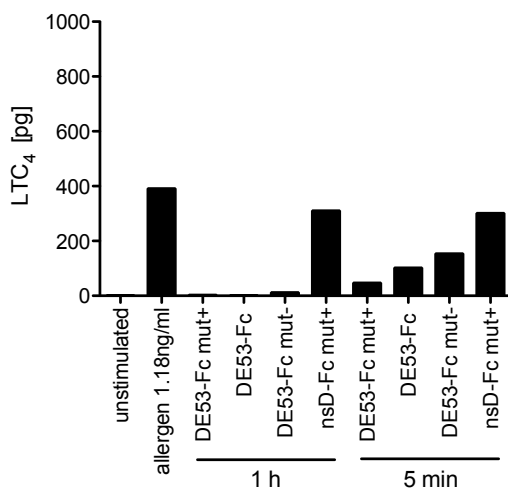

Donor 4

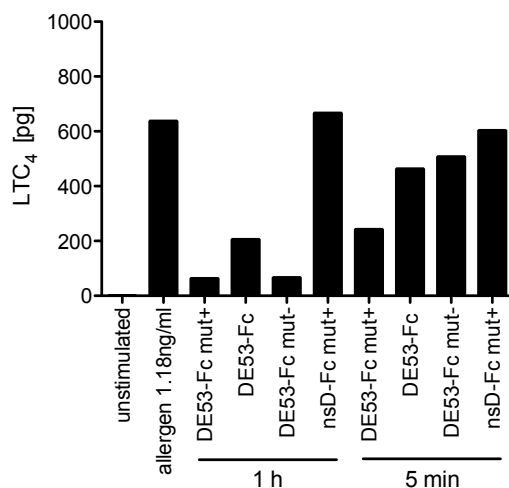

Donor 5

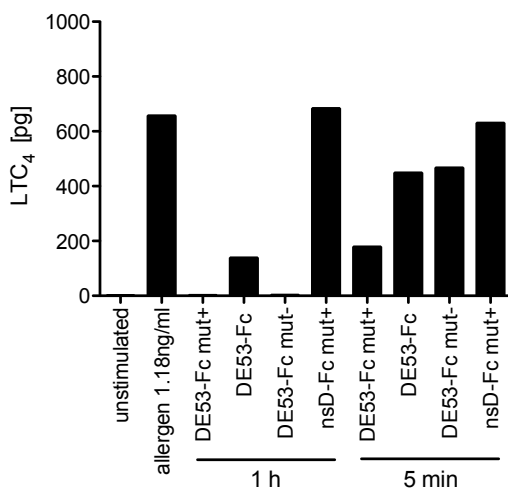

Supplement: Supplementary file 1 [file 1]

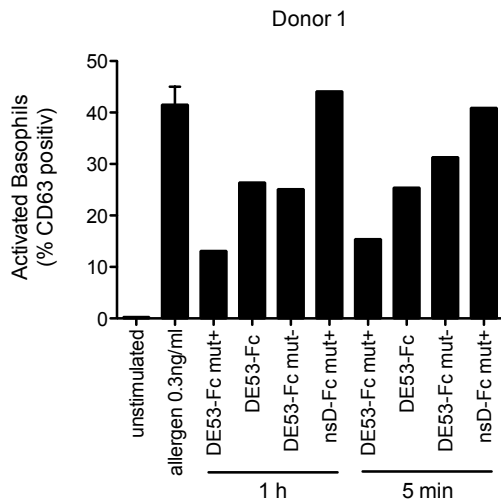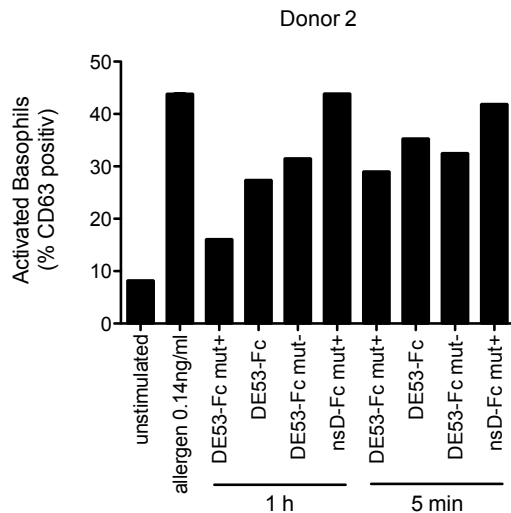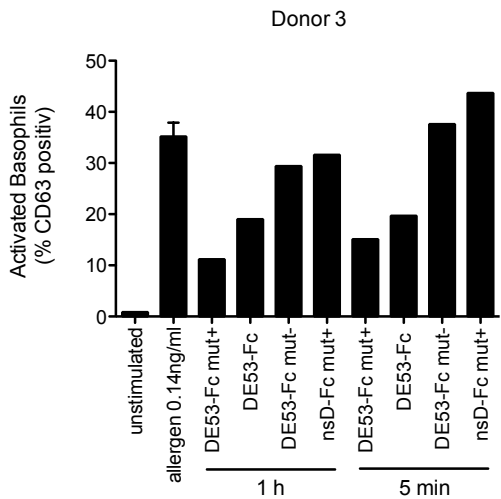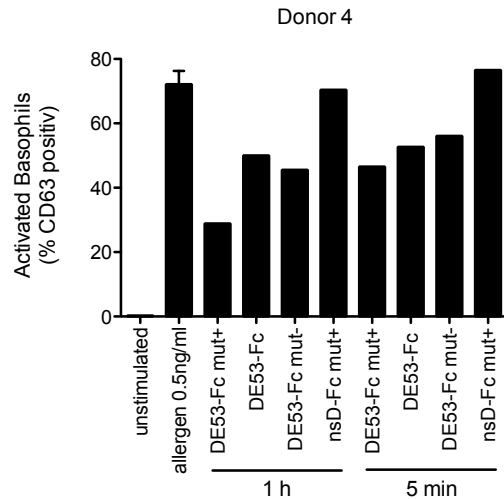

Donor 1

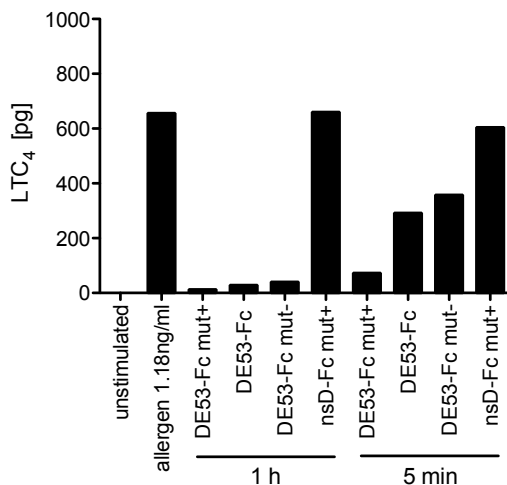

Donor 2

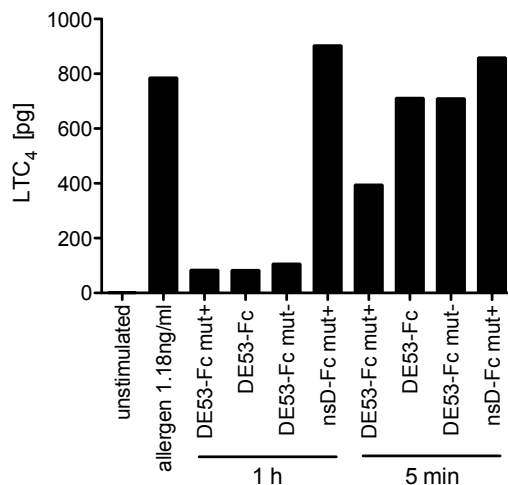

Donor 3

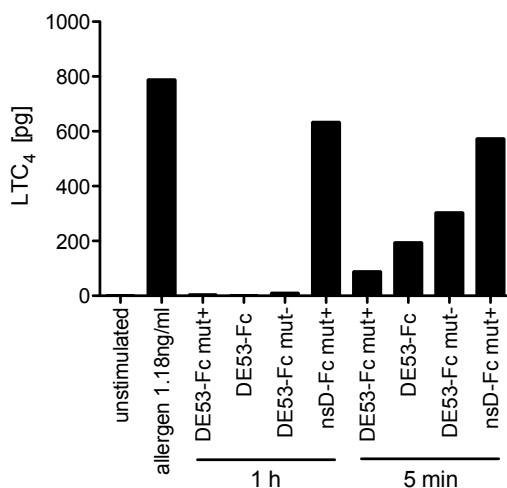

Donor 4

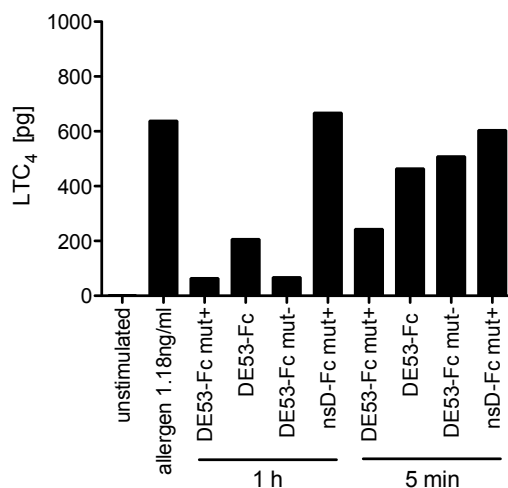

Donor 5

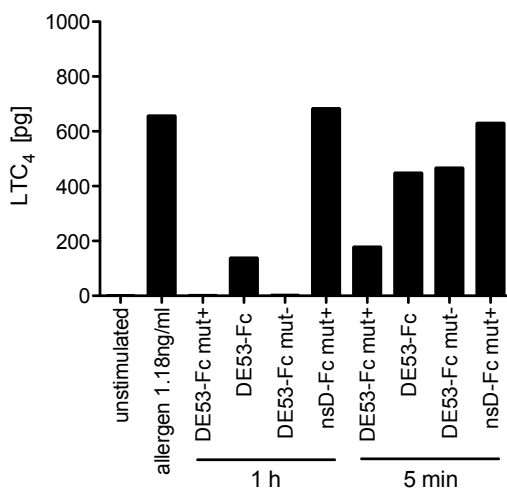

Donor 1

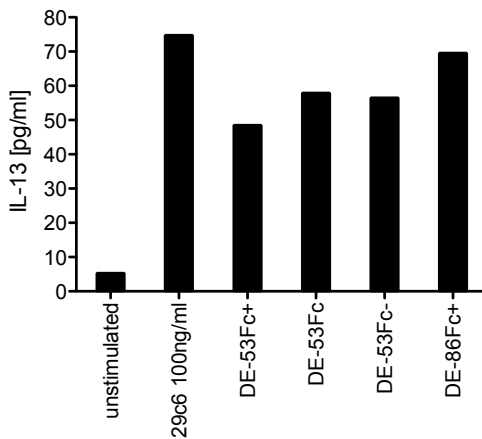

Donor 2

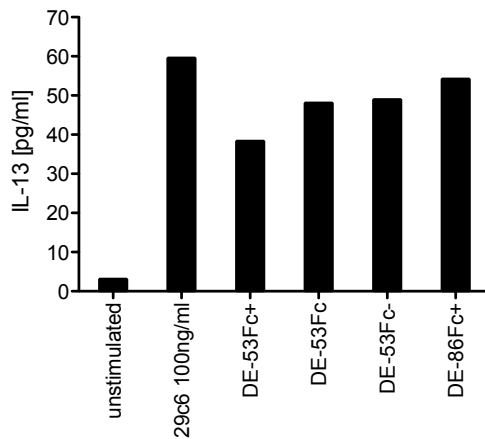

Donor 3

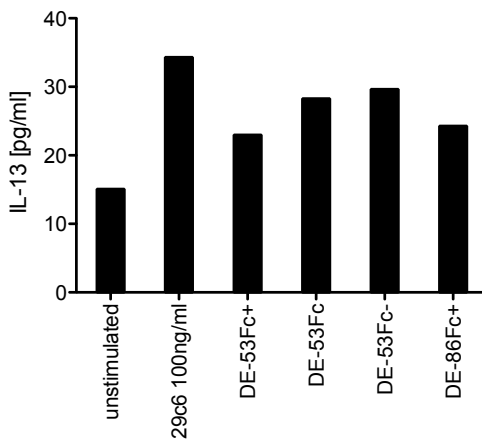

Donor 3

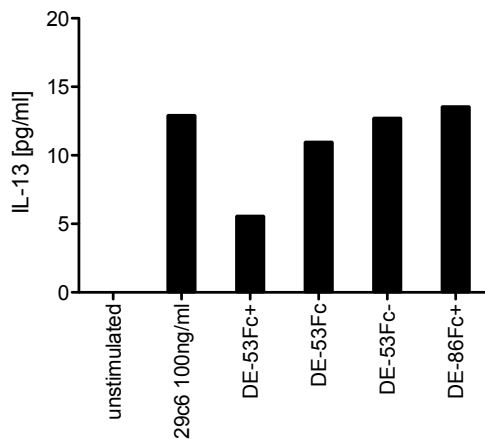

Supplement: Supplementary file 2 [file 1]

Donor 1

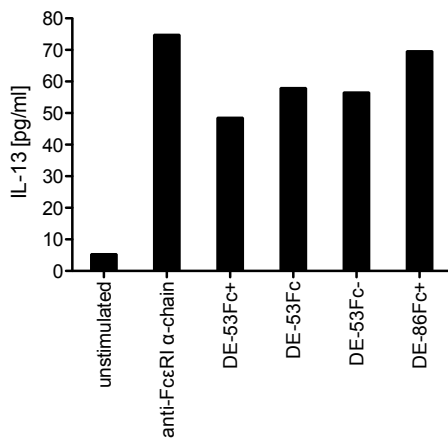

Donor 2

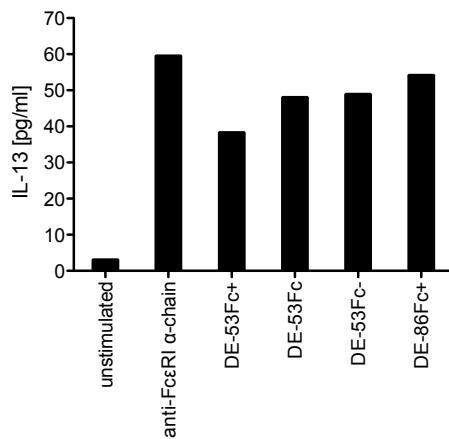

Donor 3

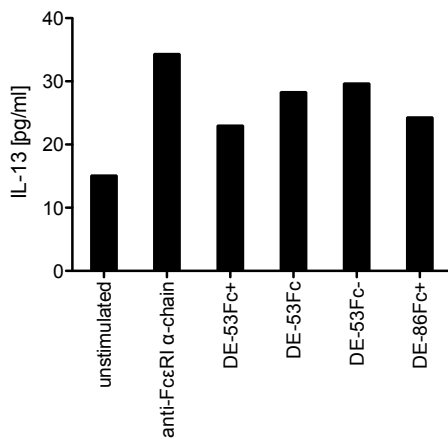

Donor 3

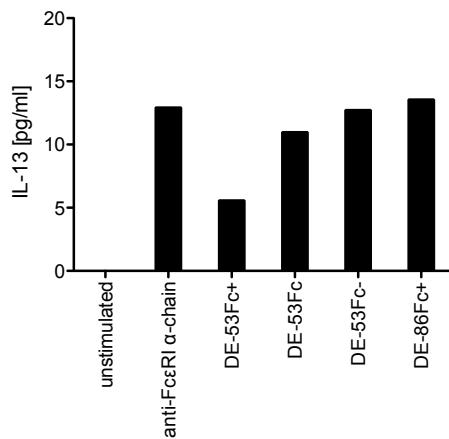

Supplement: Supplementary file 3 [file 1]
